# Supplementary material for: Large area growth of vertically aligned luminescent MoS2nanosheets
Source: Royal Society of Chemistry journal article supplement (doi:10.1039/c6nr07965b), 2016-11-18
Supplement: c6nr07965b1.pdf [file c6nr07965b1.pdf]

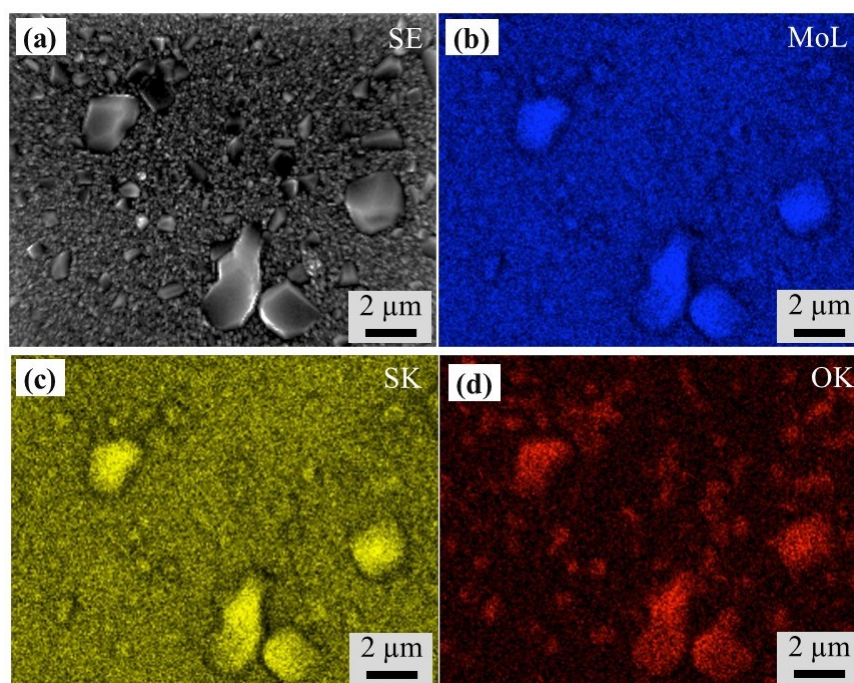

**Figure S1** EDS map-scan of the sulfurized 50 nm Mo film surface, showing the elemental composition of the material.
