# Supplementary material for: Large area growth of vertically aligned luminescent MoS2nanosheets
Source: Royal Society of Chemistry journal article supplement (doi:10.1039/c6nr07965b), 2016-11-18
Supplement: c6nr07965b2.pdf [file c6nr07965b2.pdf]

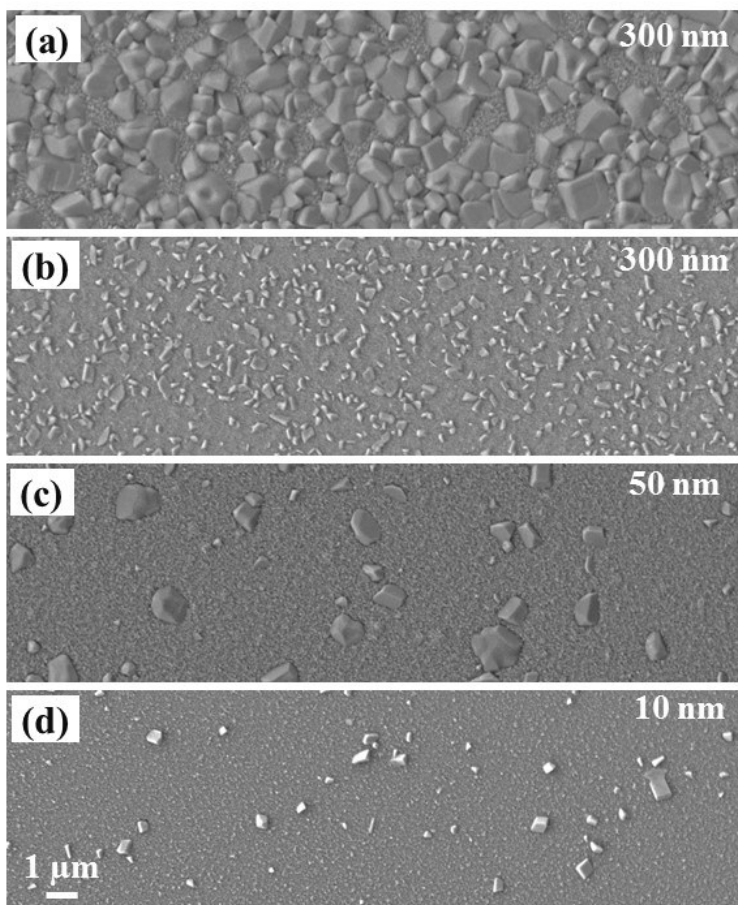

**Figure S2** (a) SEM imaging results for sputter deposited Mo films sulfurized at 850°C for 30 min. In (a) the 300 nm Mo film sulfurized using 150 mg of S powder, and in (b), (c) and (d) the 300, 50 and 10 nm films, respectively, sulfurized using 300 mg of S powder. (High magnification images for samples presented in panel (b) and (c) are provided in Figure 1 which confirm the nanosheet presence.)
