# Supplementary material for: Large area growth of vertically aligned luminescent MoS2nanosheets
Source: Royal Society of Chemistry journal article supplement (doi:10.1039/c6nr07965b), 2016-11-18
Supplement: c6nr07965b3.pdf [file c6nr07965b3.pdf]

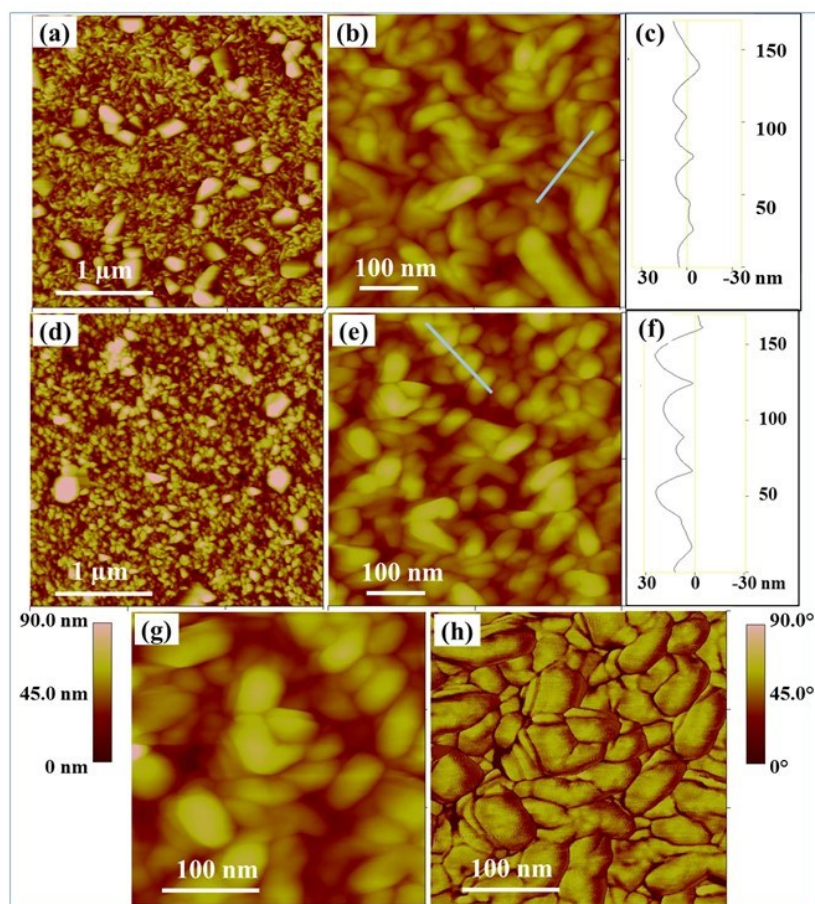

**Figure S3** Representative AFM images: a) and b) topographic images for the 300 nm S-Mo film. (d), (e) and (g) topographic images with (h) phase image of panel (g) for the 50 nm S-Mo film. In (c) and (f) the height profiles showing the typical thickness of the nanosheets from panel (b) and (e) respectively. The Z- axis scale for panels (a), (b), (d) and, (e) is the same as for (g).
