# Supplementary material for: Large area growth of vertically aligned luminescent MoS2nanosheets
Source: Royal Society of Chemistry journal article supplement (doi:10.1039/c6nr07965b), 2016-11-18
Supplement: c6nr07965b4.pdf [file c6nr07965b4.pdf]

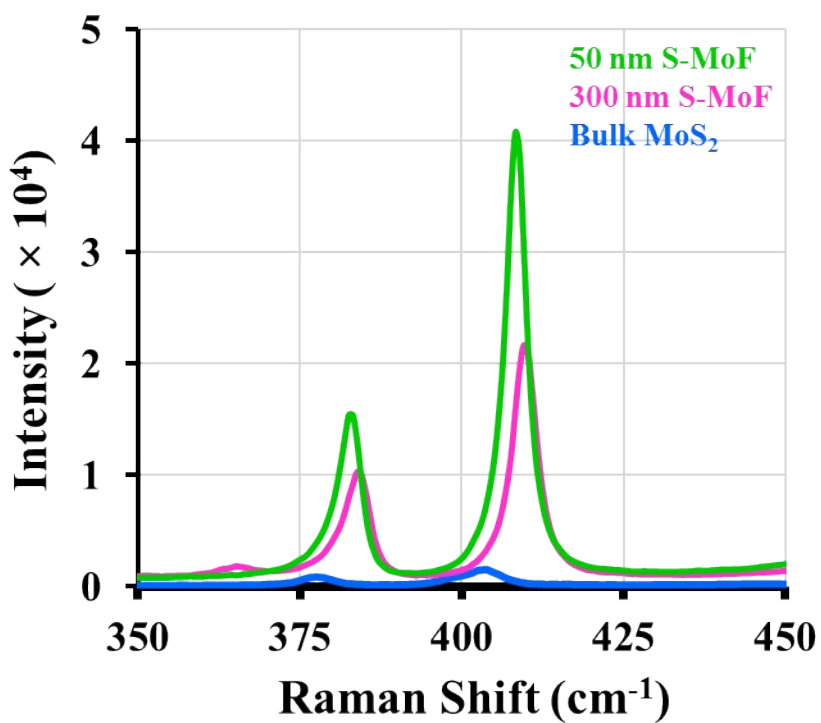

**Figure S4** Raman spectra (acquisition time 60 s) for bulk, 300 nm S-Mo and 50 nm S-Mo samples indicating one order of magnitude enhancement in the A<sub>1g</sub> mode for the NSs samples as compared to the bulk MoS<sub>2</sub>
